# Supplementary material for: Utilizing EPR spectroscopy to investigate the liquid adsorption properties of bimetallic MIL-53(Al/Cr) MOF
Source: Royal Society of Chemistry journal article supplement (doi:10.1039/d3ra07952j), 2024-01-01
Supplement: d3ra07952j1.pdf [file d3ra07952j1.pdf]

## ***SUPPORTING INFORMATION***

# **Utilizing EPR Spectroscopy to Investigate the Liquid Adsorption Properties of Bimetallic MIL-53(Al/Cr) MOF**

Kavipriya Thangavel<sup>1, 2</sup>, Andrea Folli<sup>3\*</sup>, Marcus Fischer<sup>4</sup>, Martin Hartmann<sup>4</sup>, Damien M Murphy<sup>2</sup> and Andreas Pöpll<sup>1\*</sup>

<sup>1</sup>*Felix Bloch Institute for Solid State Physics, Leipzig University, Linnestraße 5, 04103 Leipzig, Germany*

<sup>2</sup>*School of Chemistry, Main building, Cardiff University, Cardiff CF10 3AT, United Kingdom*

<sup>3</sup>*Net Zero Innovation Institute, Cardiff Catalysis Institute, School of Chemistry, Cardiff University, Translational Research Hub, Maindy Road, CF24 4HF, Cardiff, UK*

<sup>4</sup>*Erlangen Center for Interface Research and Catalysis (ECRC), Friedrich-Alexander-Universität Erlangen-Nürnberg, Egerlandstrasse 3, 91058, Erlangen, Germany*

### **Table of contents**

- 1. XRD data and structural information of MIL-53(Al<sub>0.99</sub>Cr<sub>0.01</sub>) .....2**
- 2. Simulated Cr(III) EPR powder spectra with *E* dependence trend for fixed *D* value .....4**
- 3. Auxilliary temperature dependent EPR data of MIL-53(Al<sub>0.99</sub>Cr<sub>0.01</sub>) .....5**

## S1. XRD data of MeOH adsorbed MIL-53( $\text{Al}_{0.99}\text{Cr}_{0.01}$ )

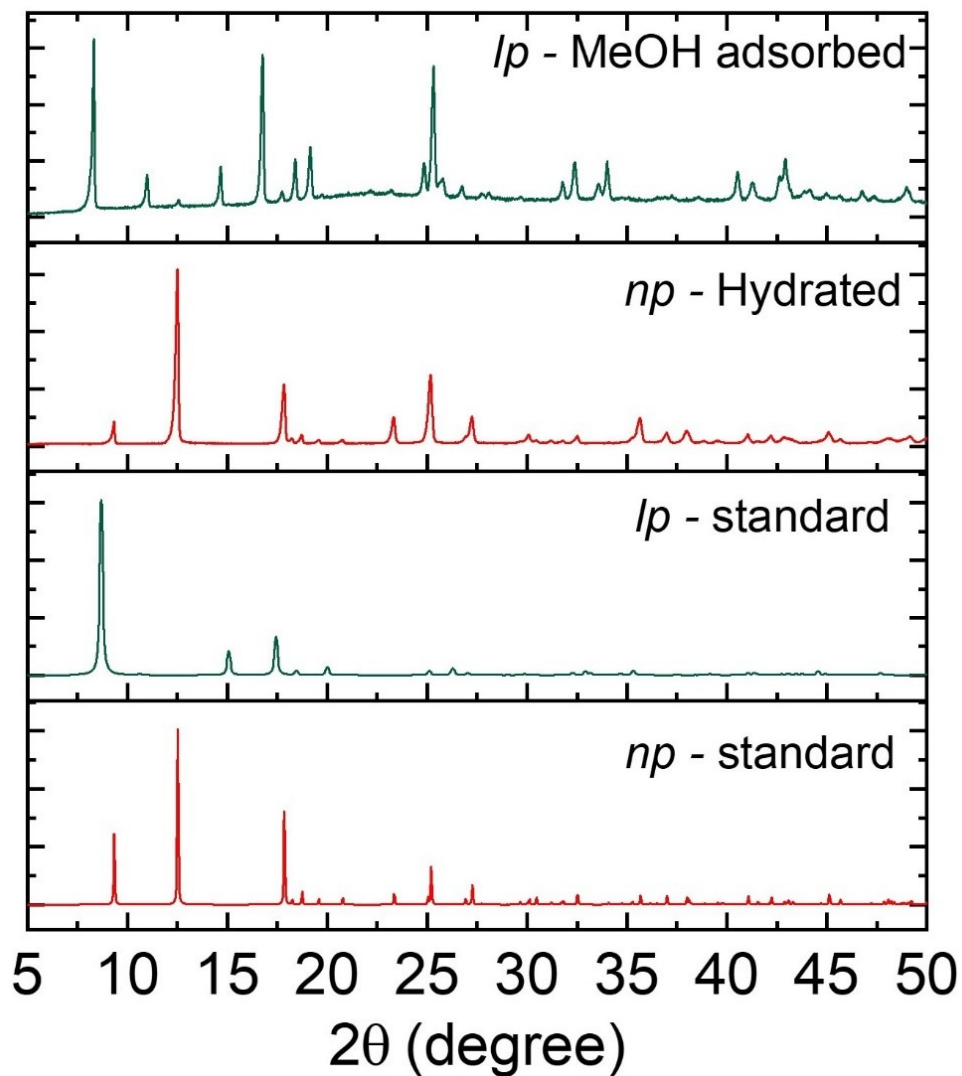

**Figure S1.** Theoretical PXRD patterns of the *np* and *lp* phase of MIL-53(Al) compared with the hydrated MIL-53( $\text{Al}_{0.99}\text{Cr}_{0.01}$ ) and subsequently in MeOH adsorbed MOF. Theoretical patterns are calculated from the crystallographic data taken from Liu *et al.*<sup>1</sup>

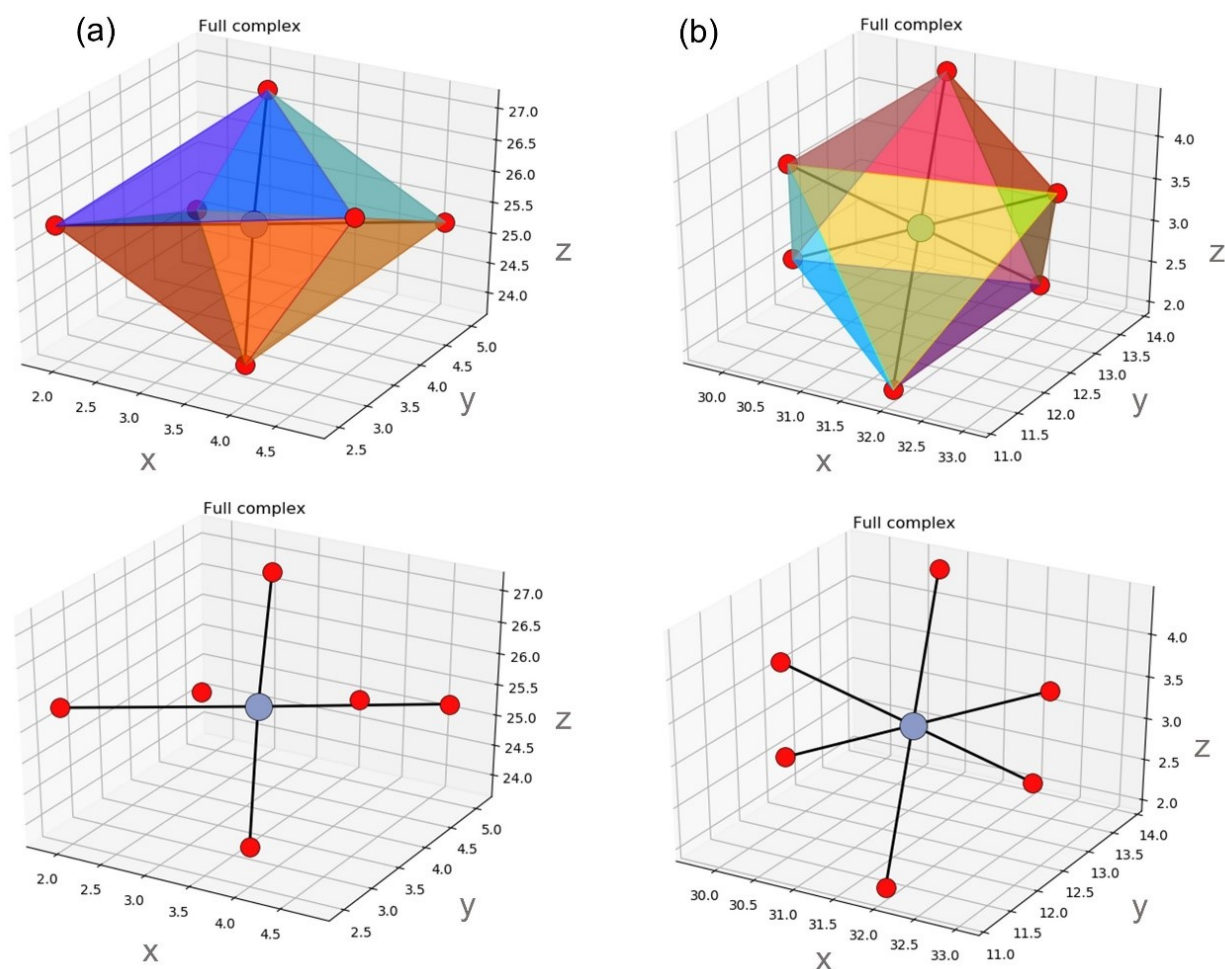

**Figure S2.**  $\text{AlO}_4(\text{OH})_2$  octahedral unit of (a) hydrated (*np* phase) and (b) activated (*lp* phase) of MIL-53(Al) extracted from the OctaDist software.<sup>2</sup>

**Table S1:** The distance between the metal ion and the surrounded oxygen in the  $\text{AlO}_4(\text{OH})_2$  octahedral unit for the *np* and *lp* phase of MIL-53( $\text{Al}_{0.99}\text{Cr}_{0.01}$ ) extracted from the OctaDist software.<sup>2</sup>

| Bond  | Bond distance (Å)          |                             |
|-------|----------------------------|-----------------------------|
|       | <i>np</i> phase (hydrated) | <i>lp</i> phase (activated) |
| Al-O1 | 1.810742                   | 1.806349                    |
| Al-O2 | 2.003136                   | 1.918834                    |
| Al-O3 | 1.912103                   | 1.918827                    |
| Al-O4 | 1.924856                   | 1.918837                    |
| Al-O5 | 1.879603                   | 1.806358                    |
| Al-O6 | 2.006225                   | 1.918830                    |

## S2. Simulated Cr(III) EPR powder spectra with $E$ dependence trend for fixed $D$ -value

(a)

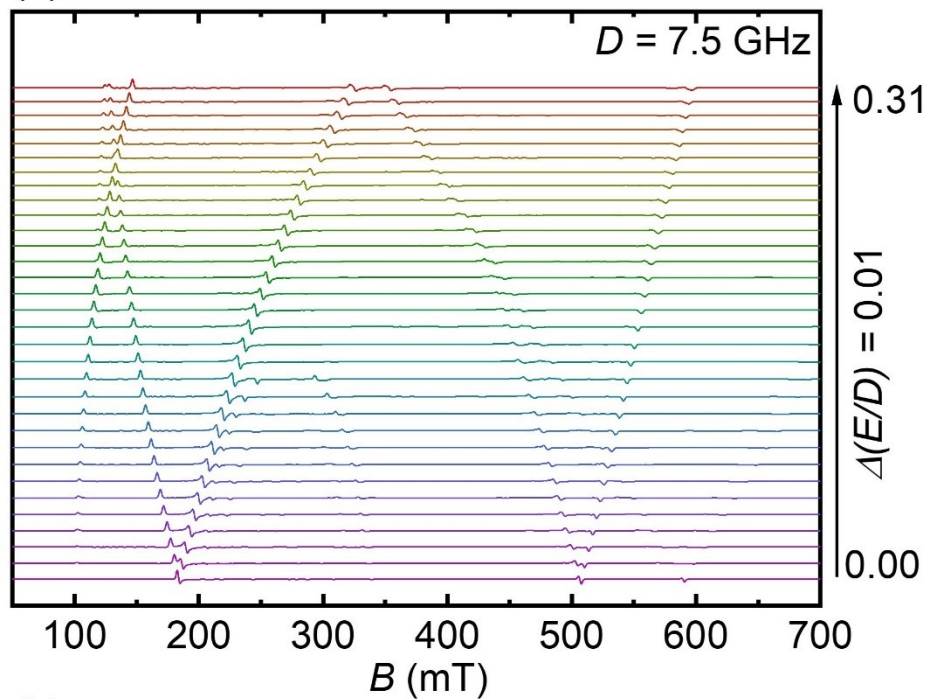

(b)

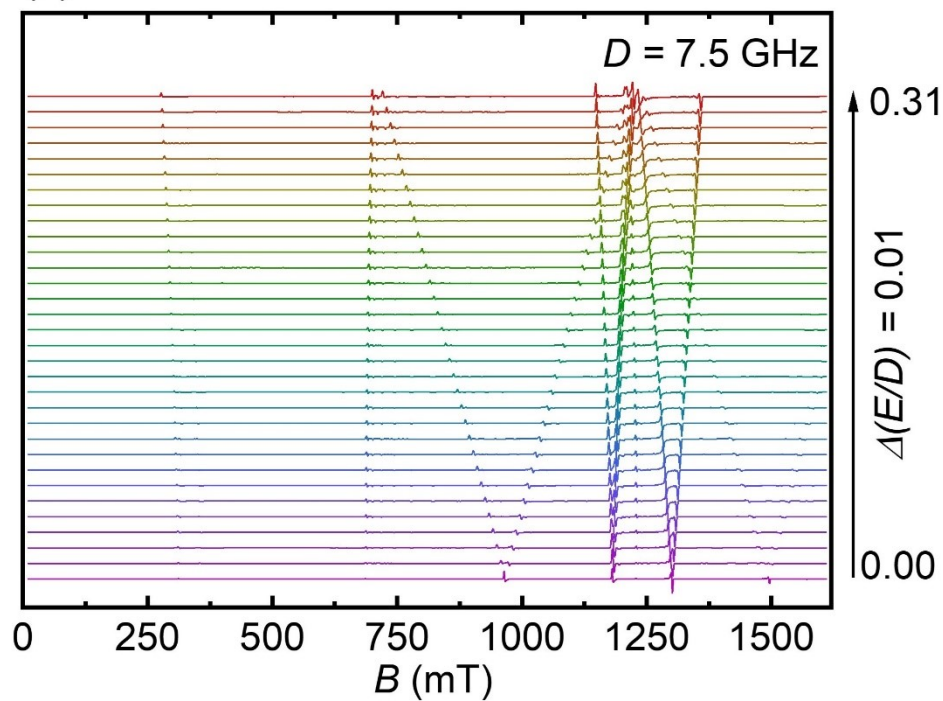

Figure S3.  $E$  dependence trend with  $D = 7.5$  GHz for the (a) X- (9.4 GHz) and (b) Q-band (34 GHz) frequencies.

### S3. Auxiliary temperature-dependent EPR data of

#### MIL-53( $\text{Al}_{0.99}\text{Cr}_{0.01}$ )

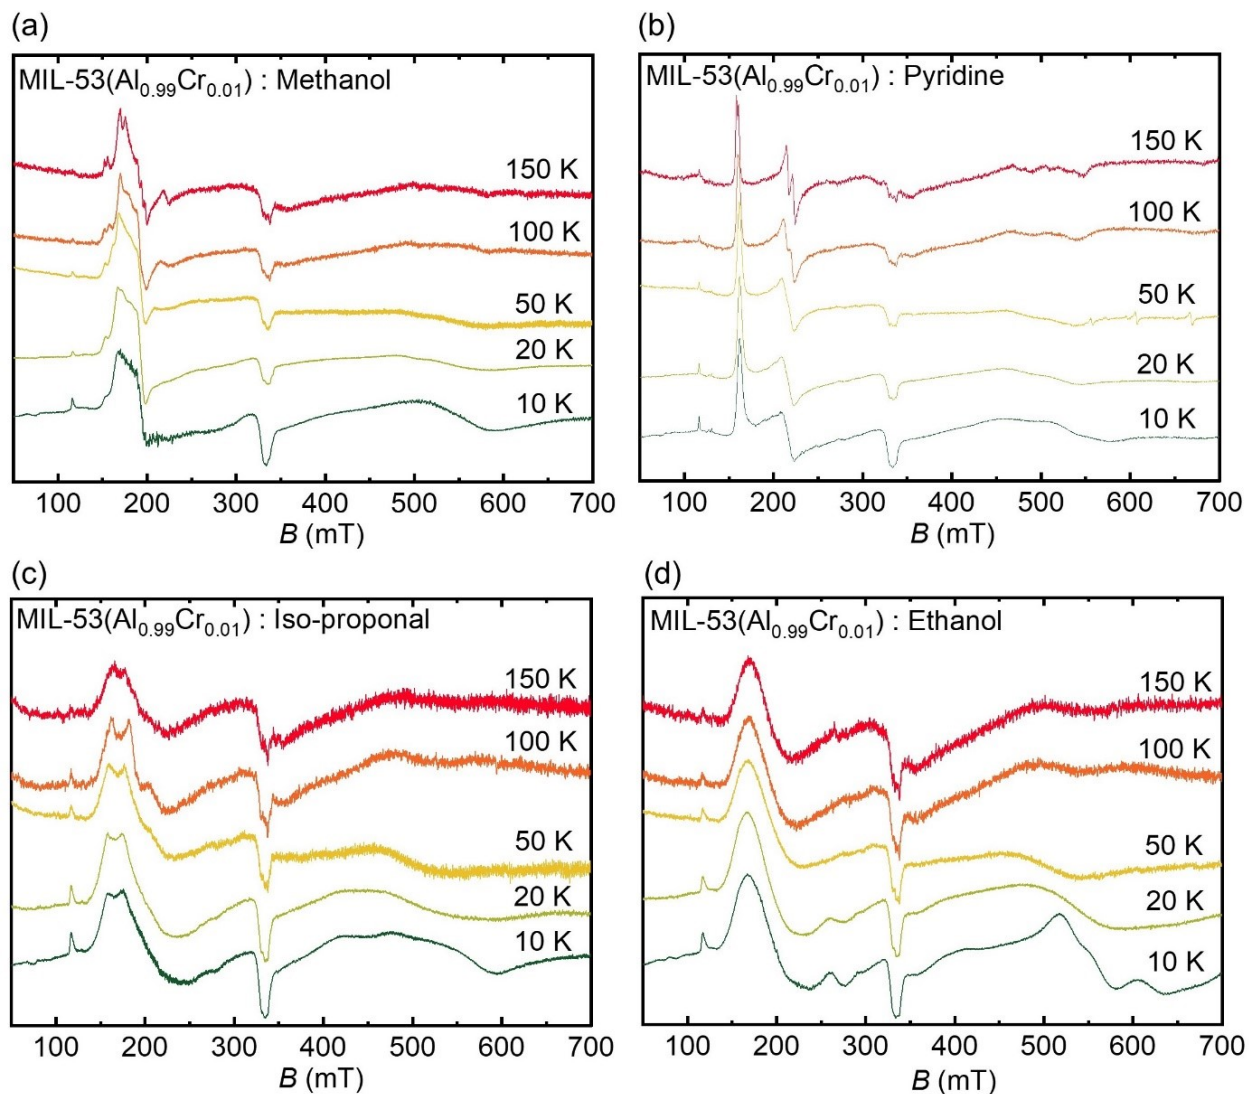

**Figure S4:** Temperature-dependent X-band EPR experiments of MIL-53( $\text{Al}_{0.99}\text{Cr}_{0.01}$ ) with (a) MeOH, (b) py, (c) PrOH and (d) EtOH liquid adsorption

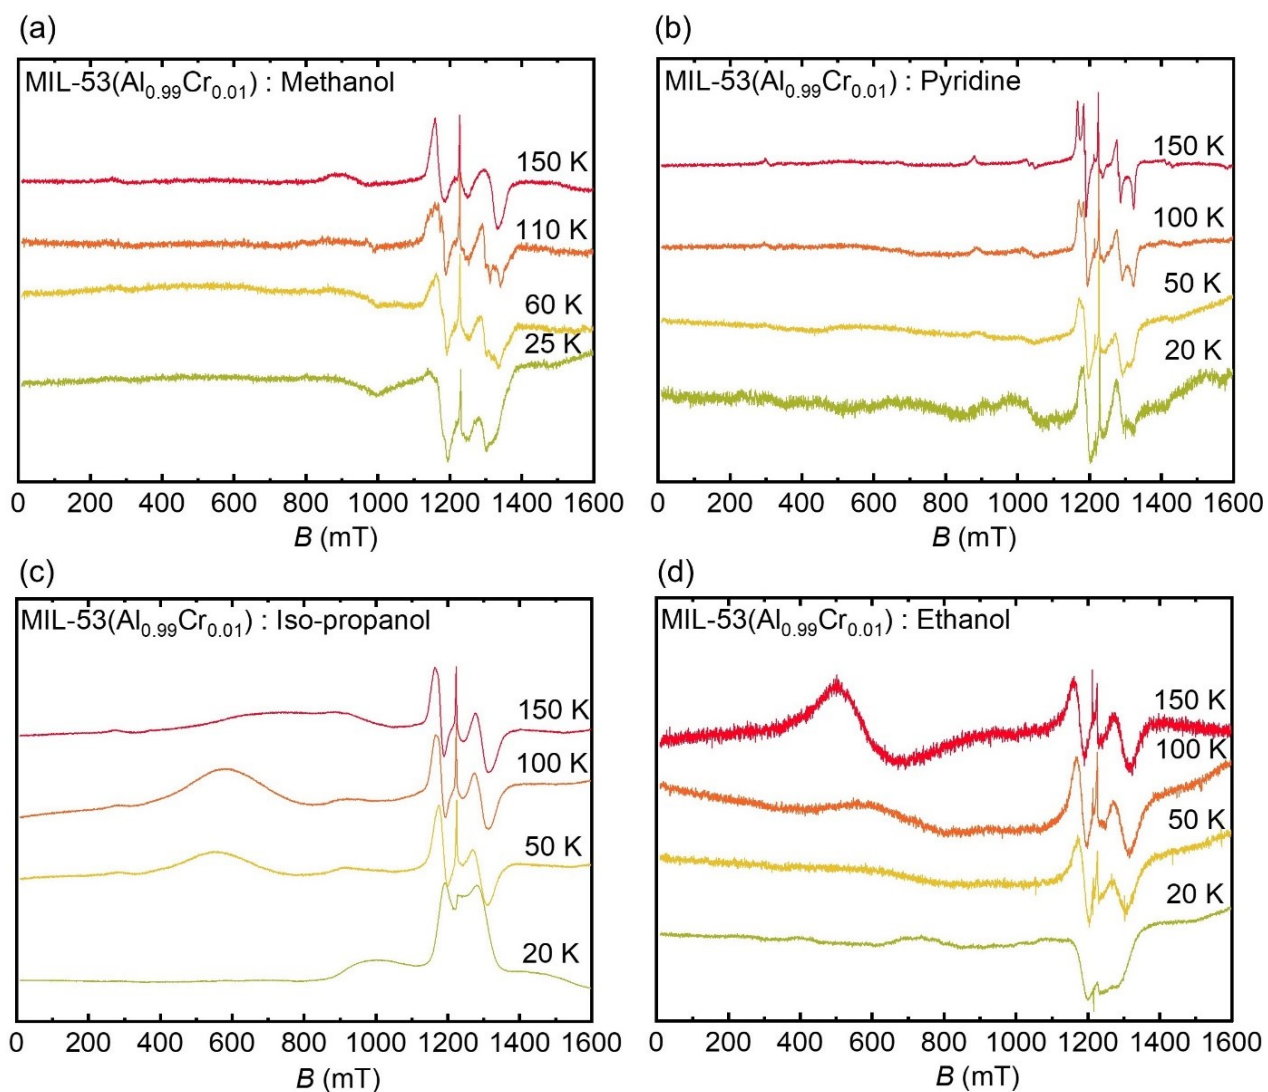

**Figure S5:** Temperature-dependent Q-band EPR experiments of MIL-53( $\text{Al}_{0.99}\text{Cr}_{0.01}$ ) with (a) MeOH, (b) py, (c) PrOH and (d) EtOH liquid adsorption

**Table S2: The spin Hamiltonian parameters  $g_{iso}$ ,  $D$ ,  $\Delta D$ ,  $\Delta E$ ,  $E/D$  of  $S = 3/2$  Cr(III) ion in hydrated MIL-53( $Al_{0.99}Cr_{0.01}$ ) MOF measured by X-band EPR during  $H_2O/MeOH$  adsorption at different concentrations (measured at  $T = 300$  K)**

| Species ( $H_2O:MeOH$ )                      | $g_{iso}$             | $D$<br>(GHz)       | $\Delta D$<br>(GHz) | $\Delta E$<br>(GHz) | $E/D$                |
|----------------------------------------------|-----------------------|--------------------|---------------------|---------------------|----------------------|
| (a) Hydrated                                 | 1.977(1)              | 7.50(10)           | 0.40(5)             | 0.19(4)             | 0.313(2)             |
| (b) 10:0 <i>np</i> (100%)                    | 1.975(3)              | 7.50(2)            | 0.50(5)             | <0.00(1)            | 0.313(2)             |
| (c) 10:2 <i>np</i> (94%)<br><i>lp</i> (6%)   | 1.975(3)<br>1.975(3)  | 7.50(2)<br>7.50(2) | 0.50(5)<br>0.50(5)  | <0.00(1)<br>0.30(4) | 0.313(2)<br>0.313(2) |
| (d) 10:4 <i>np</i> (83%)<br><i>lp</i> (17%)  | 1.975(3)<br>1.978(3)  | 7.50(2)<br>8.50(5) | 0.40(5)<br>1.10(5)  | 0.19(5)<br>0.30(3)  | 0.313(3)<br>0.017(3) |
| (e) 10:5 <i>np</i> (63%)<br><i>lp</i> (37%)  | 1.975 (3)<br>1.978(3) | 7.50(2)<br>8.50(5) | 0.55(2)<br>1.10(5)  | 0.19(5)<br>0.30(3)  | 0.313(3)<br>0.017(3) |
| (f) 10:6 <i>np</i> (40%)<br><i>lp</i> (60%)  | 1.975(5)<br>1.978(3)  | 7.40(2)<br>8.50(5) | 0.70(8)<br>1.10(5)  | 0.19(5)<br>0.30(3)  | 0.318(5)<br>0.017(3) |
| (g) 10:10 <i>np</i> (17%)<br><i>lp</i> (83%) | 1.975(3)<br>1.978(3)  | 7.50(2)<br>8.50(5) | 0.40(5)<br>1.10(5)  | 0.19(5)<br>0.30(3)  | 0.313(3)<br>0.017(3) |
| (h) 10:15 <i>np</i> (5%)<br><i>lp</i> (95%)  | 1.975(3)<br>1.978(3)  | 7.50(2)<br>8.50(5) | 0.40(5)<br>1.10(5)  | 0.19(5)<br>0.30(3)  | 0.313(3)<br>0.017(3) |
| (i) 10:20 <i>lp</i> (100%)                   | 1.978(1)              | 8.45(12)           | 1.10(2)             | 0.40(5)             | 0.011(4)             |

**Table S3: The information about the unit cell volume of MIL-53(M) upon adsorption for different solvents from the reported literature**

| Adsorbents             | Phase     | Volume unit cell<br>( $\text{\AA}^3$ ) | Metal ion | Reference                           |
|------------------------|-----------|----------------------------------------|-----------|-------------------------------------|
| Empty<br>(unactivated) | <i>np</i> | 886                                    | Al(III)   | Liu <i>et al.</i> <sup>1</sup>      |
| Empty<br>(activated)   | <i>lp</i> | 1480                                   | Cr(III)   | Bourelly <i>et al.</i> <sup>3</sup> |
| Pyridine               | <i>lp</i> | 1395                                   | Al(III)   | Vougo <i>et al.</i> <sup>4</sup>    |
| Methanol               | <i>lp</i> | 1538                                   | Cr(III)   | Bourelly <i>et al.</i> <sup>3</sup> |
| Water                  | <i>np</i> | 1017                                   | Cr(III)   | Bourelly <i>et al.</i> <sup>3</sup> |

## References:

- 1 Y. Liu, J.-H. Her, A. Dailly, A. J. Ramirez-Cuesta, D. A. Neumann and C. M. Brown, Reversible structural transition in MIL-53 with large temperature hysteresis, *Journal of the American Chemical Society*, 2008, **130**, 11813–11818.
- 2 R. Ketkaew, Y. Tantirungrotechai, P. Harding, G. Chastanet, P. Guionneau, M. Marchivie and D. J. Harding, OctaDist: a tool for calculating distortion parameters in spin crossover and coordination complexes, *Dalton transactions (Cambridge, England : 2003)*, 2021, **50**, 1086–1096.
- 3 S. Bourrelly, B. Moulin, A. Rivera, G. Maurin, S. Devautour-Vinot, C. Serre, T. Devic, P. Horcajada, A. Vimont, G. Clet, M. Daturi, J.-C. Lavalley, S. Loera-Serna, R. Denoyel, P. L. Llewellyn and G. Férey, Explanation of the adsorption of polar vapors in the highly flexible metal organic framework MIL-53(Cr), *Journal of the American Chemical Society*, 2010, **132**, 9488–9498.
- 4 M. Vougo-Zanda, J. Huang, E. Anokhina, X. Wang and A. J. Jacobson, Tossing and turning: guests in the flexible frameworks of metal(III) dicarboxylates, *Inorganic chemistry*, 2008, **47**, 11535–11542.
